# Supplementary material for: Structural reorganization of the chromatin remodeling enzyme Chd1 upon engagement with nucleosomes
Source: eLife journal article supplement (doi:10.7554/elife.22510), 2017-03-23
Supplement: supp [file elife-22510-supp-v1.zip]

Archive with 20 entries (20 files):
- elife_poa_e22510_Figure_2_Supplement_4.pdf
- elife_poa_e22510_Figure_1_Supplement_2.pdf
- elife_poa_e22510_Figure_5_Supplement_1.pdf
- elife_poa_e22510_Figure_1_Supplement_1.pdf
- elife_poa_e22510_Figure_7_Supplement_4.pdf
- elife_poa_e22510_Figure_3_Figure_Supplement_1.pdf
- elife_poa_e22510_Figure_2_Supplement_1.pdf
- elife_poa_e22510_Figure_8_Supplement_3.pdf
- elife_poa_e22510_Figure_2_Supplement_2.pdf
- elife_poa_e22510_Figure_2_Supplement_3.pdf
- elife_poa_e22510_Figure_5_Supplement_2.pdf
- elife_poa_e22510_Figure_7_Supplement_2.pdf
- elife_poa_e22510_Figure_5_Supplement_3.pdf
- elife_poa_e22510_Figure_8_Supplement_2.pdf
- elife_poa_e22510_Figure_2_Supplement_5.pdf
- elife_poa_e22510_Figure_2_Supplement_7.pdf
- elife_poa_e22510_Figure_2_Supplement_6.pdf
- elife_poa_e22510_Figure_7_Supplement_3.pdf
- elife_poa_e22510_Figure_8_Supplement_1.pdf
- elife_poa_e22510_Figure_7_Supplement_1.pdf
