# Supplementary material for: Structural reorganization of the chromatin remodeling enzyme Chd1 upon engagement with nucleosomes
Source: eLife journal article supplement (doi:10.7554/elife.22510), 2017-03-23
Supplement: supp [file elife-22510-supp-v1.zip › elife_poa_e22510_Figure_2_Supplement_2.pdf]

A

Chromo ATPase with labels attached

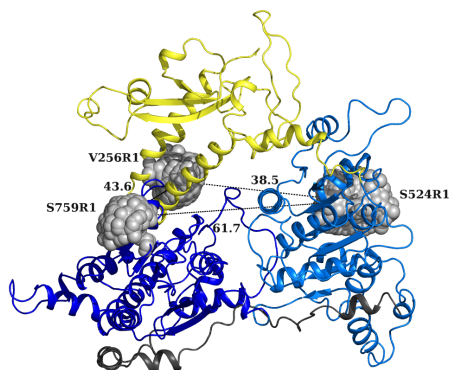

B

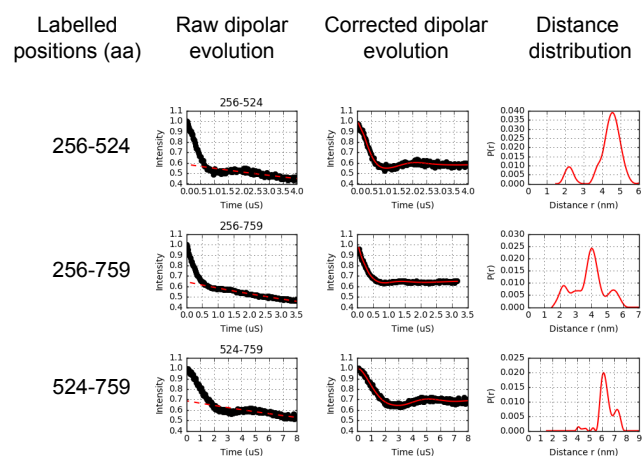

C

| label location 1  | label location 2  | measured distance (Å) | distance modelled from structure (Å) | difference (Å) |
|-------------------|-------------------|-----------------------|--------------------------------------|----------------|
| Chromodomain 256  | ATPase lobe 1 524 | 43.5                  | 38                                   | 5.5            |
| ATPase lobe 1 524 | ATPase lobe 2 759 | 62.5                  | 61                                   | 1.5            |
| Chromodomain 256  | ATPase lobe 2 759 | 40.5                  | 43                                   | 2.5            |
