# Supplementary material for: Structural reorganization of the chromatin remodeling enzyme Chd1 upon engagement with nucleosomes
Source: eLife journal article supplement (doi:10.7554/elife.22510), 2017-03-23
Supplement: supp [file elife-22510-supp-v1.zip › elife_poa_e22510_Figure_2_Supplement_6.pdf]

A

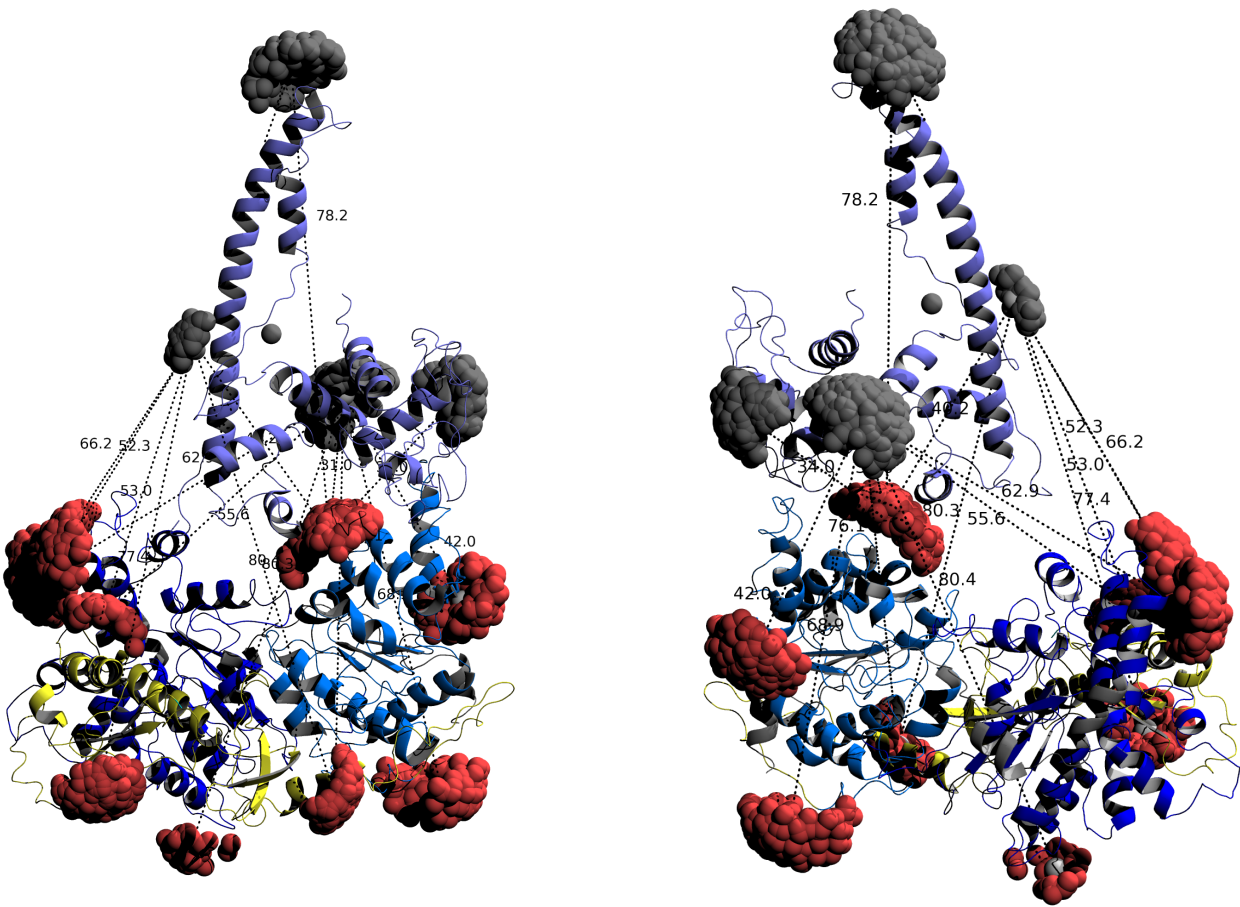

B

| ATPase Lobe1 to DNABD  |                 |                           |                                |                         |
|------------------------|-----------------|---------------------------|--------------------------------|-------------------------|
| Distance label         | DNABD AA number | chromo-Helicase AA number | Experimental Modal Distance(Å) | Model-Modal-Distance(Å) |
| 524-1063               | 1063            | 524                       | 40.1                           | 40.2                    |
| 524-1149               | 1149            | 524                       | 29                             | 31                      |
| 524-1159               | 1159            | 524                       | 33                             | 34                      |
| 524-1091               | 1091            | 524                       | 79                             | 78.2                    |
| 588-1149               | 1149            | 588                       | 39                             | 42                      |
| 365-1149               | 1149            | 365                       | 60                             | 68.4                    |
| Chromo-domain to DNABD |                 |                           |                                |                         |
| 293-1149               | 1149            | 293                       | 74                             | 76.1                    |
| 256-1063               | 1063            | 256                       | 52                             | 53.2                    |
| 256-1149               | 1149            | 256                       | 53                             | 55.6                    |
| 232-1063               | 1063            | 232                       | 74                             | 77.4                    |
| 293-1063               | 1063            | 293                       | 74                             | 80.3                    |
| 256-1072               | 1072            | 256                       | 51                             | 65                      |
| ATPase Lobe2 to DNABD  |                 |                           |                                |                         |
| 632-1063               | 1063            | 632                       | 41                             | 52.8                    |
| 632-1149               | 1149            | 632                       | 58                             | 62.9                    |
| 647-1063               | 1063            | 647                       | 59.5                           | 52.3                    |
| 759-1149               | 1149            | 759                       | 74                             | 80.4                    |
