# Supplementary figures and images for: Structural reorganization of the chromatin remodeling enzyme Chd1 upon engagement with nucleosomes
Source: eLife journal article supplement (doi:10.7554/elife.22510), 2017-03-23

## Distance measurements from ATPase lobe 2 to DBD

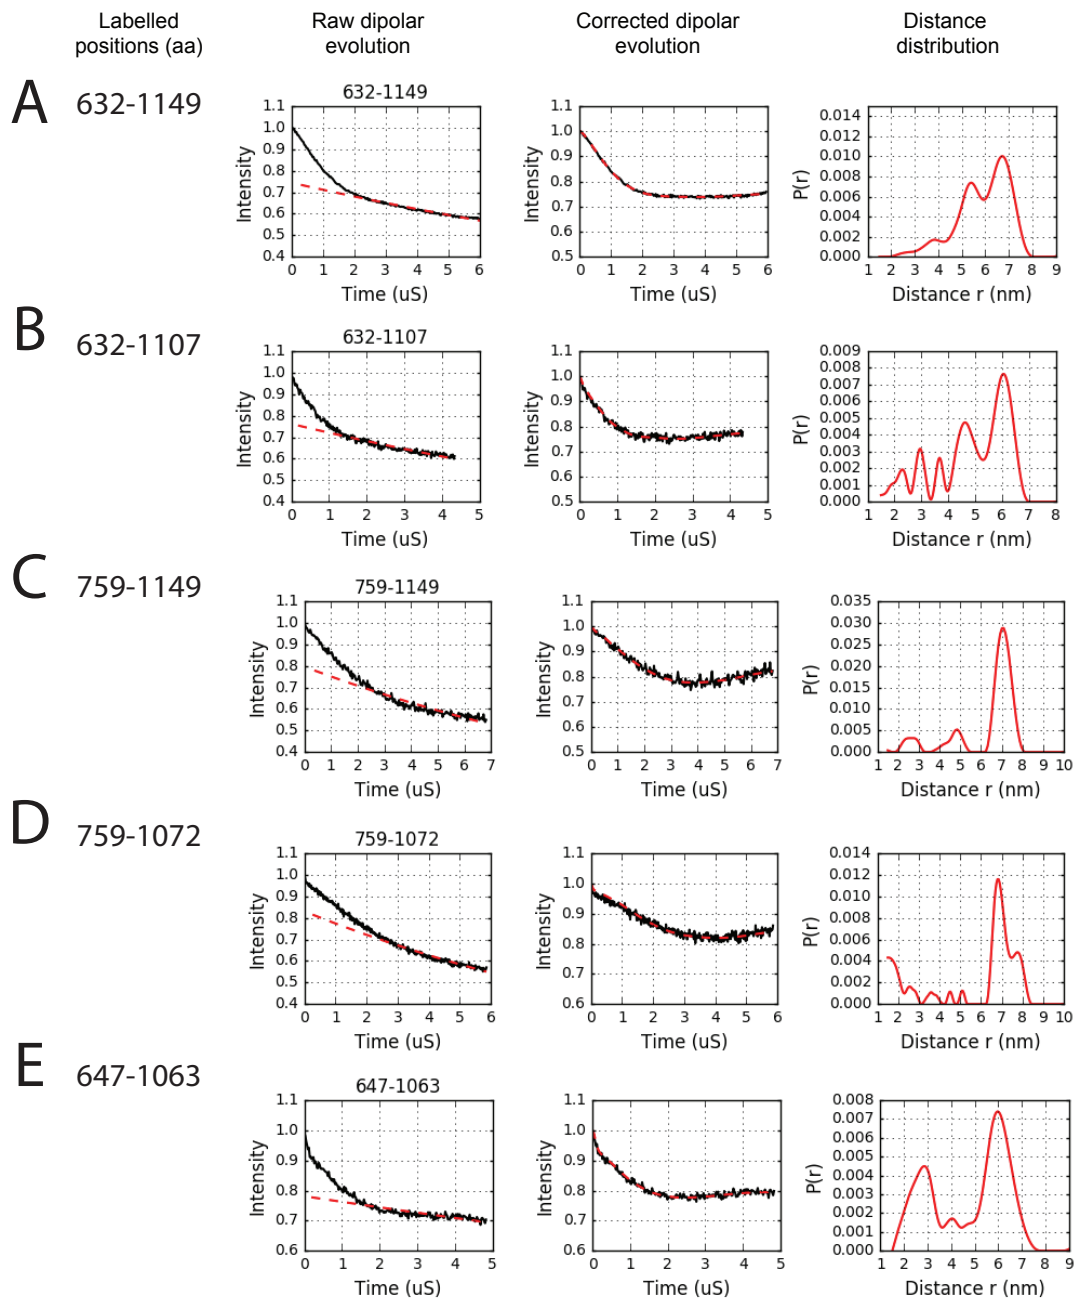

Supplement: supp [file elife-22510-supp-v1.zip › elife_poa_e22510_Figure_2_Supplement_4.pdf]

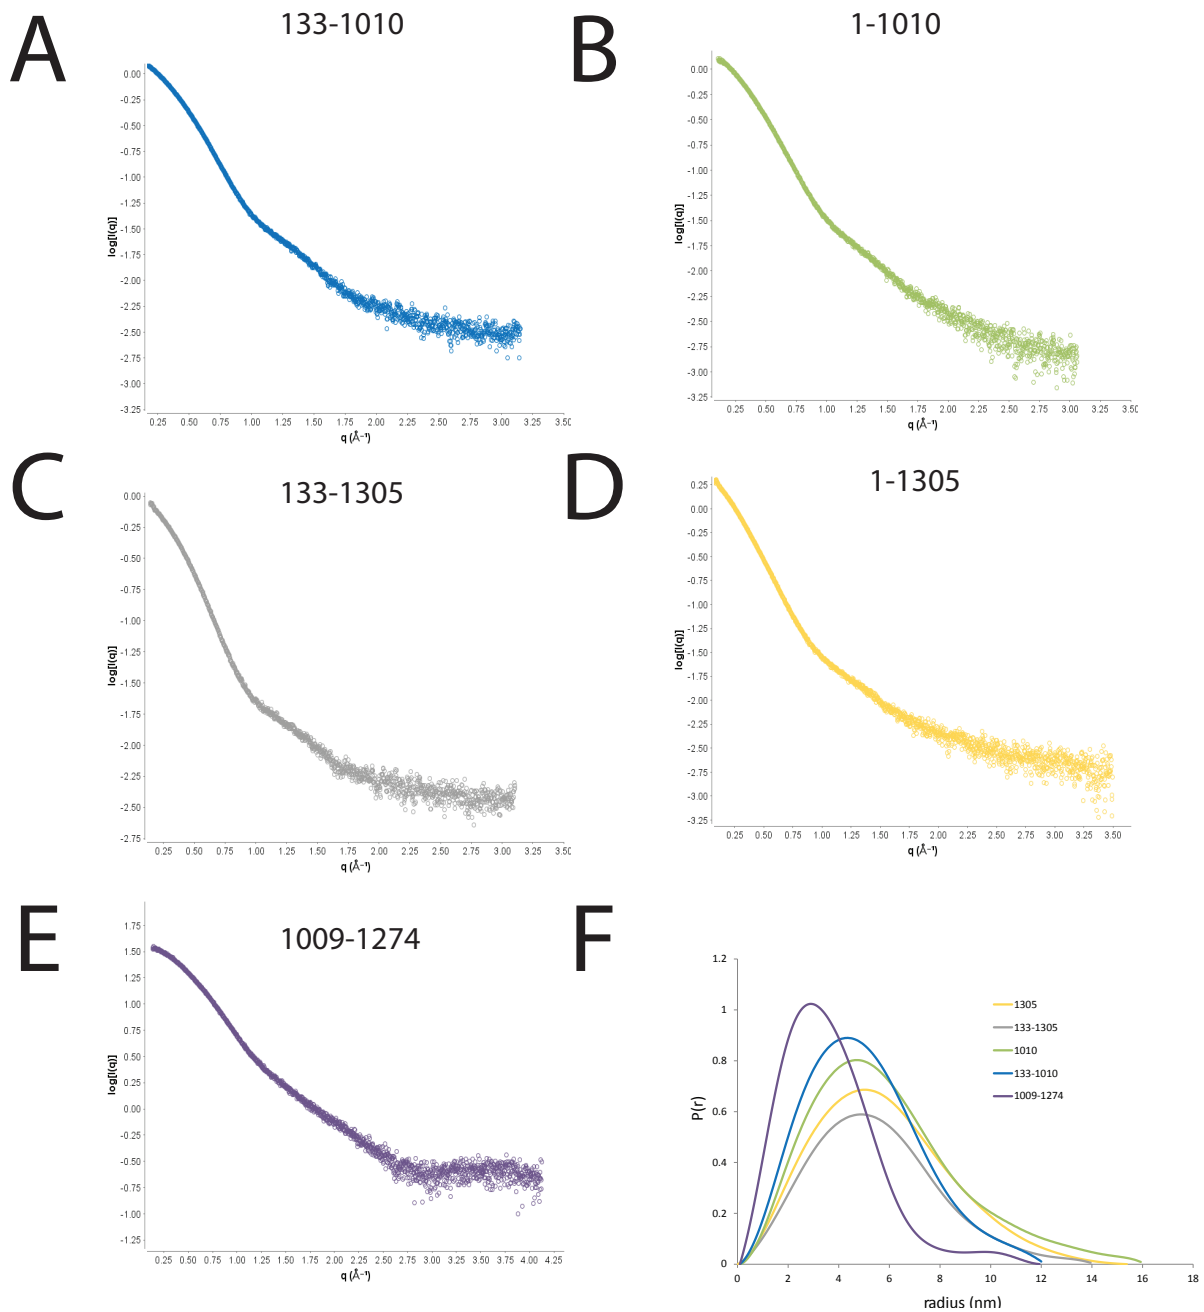

Supplement: supp [file elife-22510-supp-v1.zip › elife_poa_e22510_Figure_1_Supplement_2.pdf]

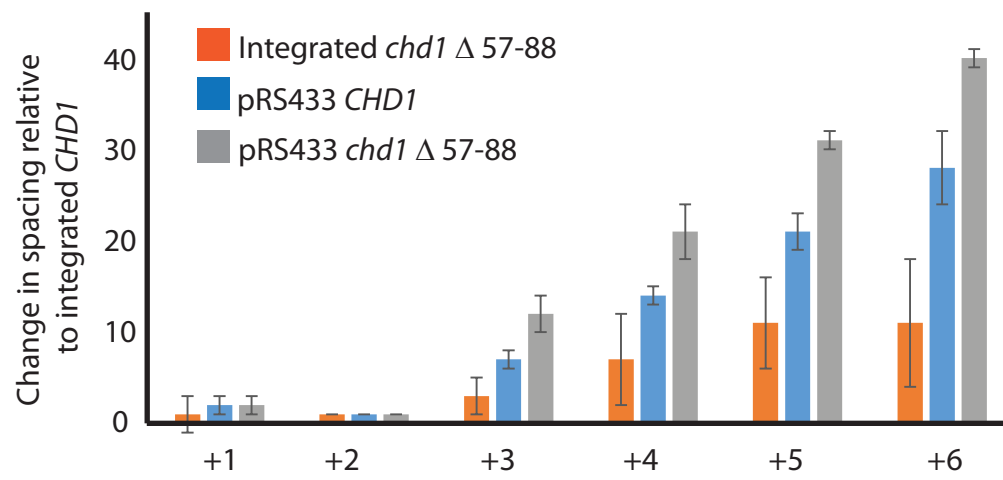

Supplement: supp [file elife-22510-supp-v1.zip › elife_poa_e22510_Figure_5_Supplement_1.pdf]

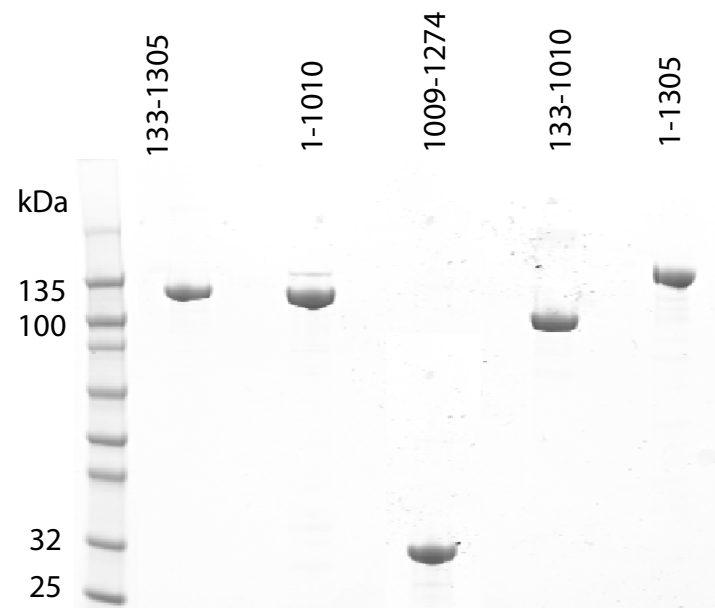

Supplement: supp [file elife-22510-supp-v1.zip › elife_poa_e22510_Figure_1_Supplement_1.pdf]

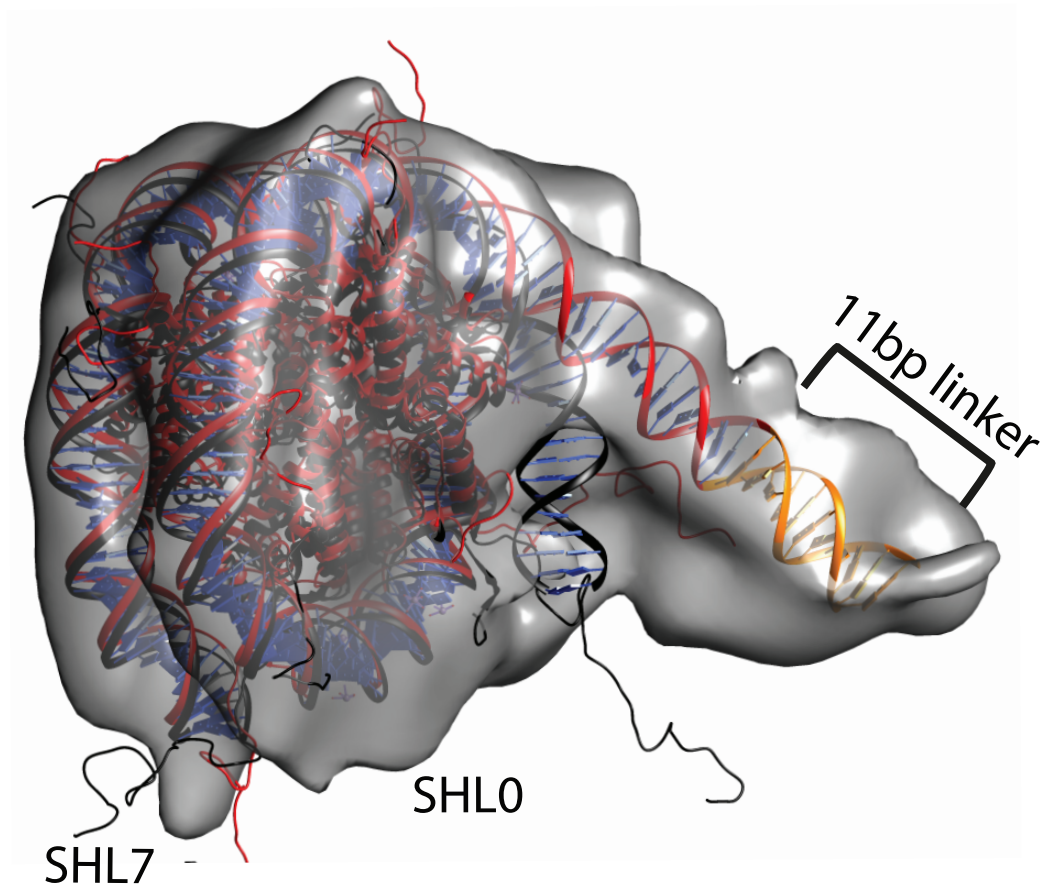

Supplement: supp [file elife-22510-supp-v1.zip › elife_poa_e22510_Figure_7_Supplement_4.pdf]

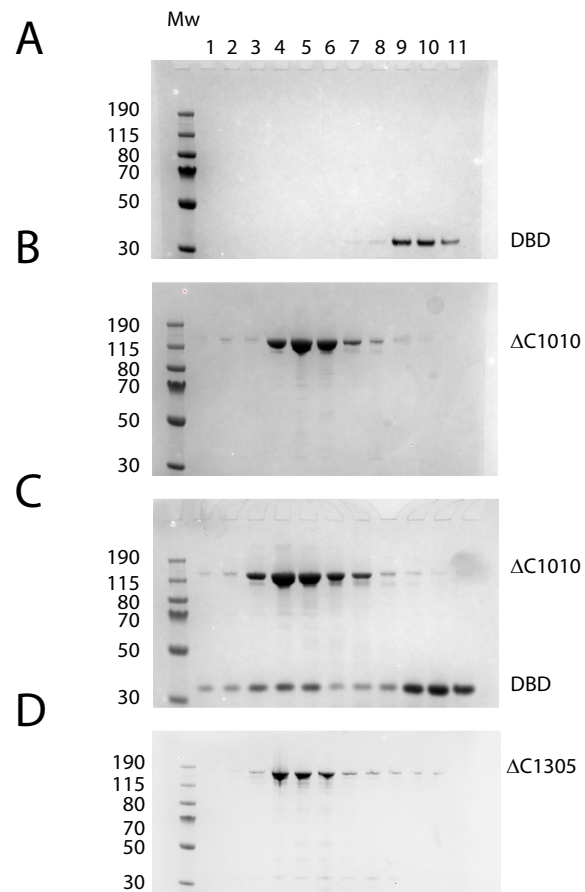

Supplement: supp [file elife-22510-supp-v1.zip › elife_poa_e22510_Figure_3_Figure_Supplement_1.pdf]

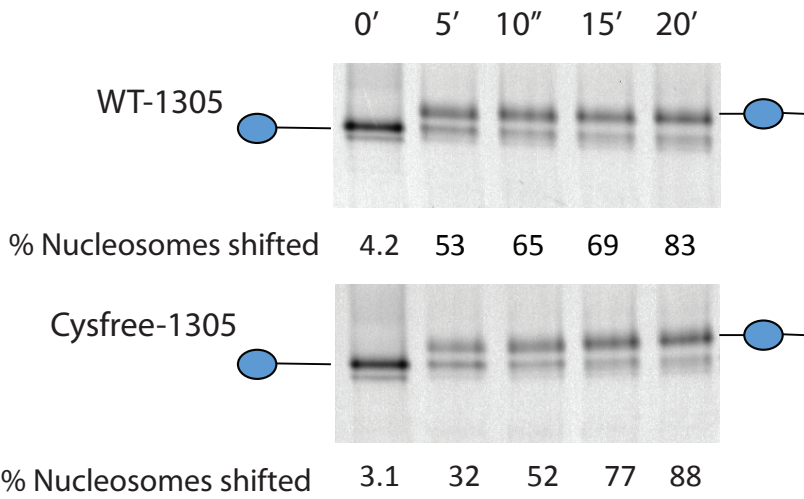

Supplement: supp [file elife-22510-supp-v1.zip › elife_poa_e22510_Figure_2_Supplement_1.pdf]

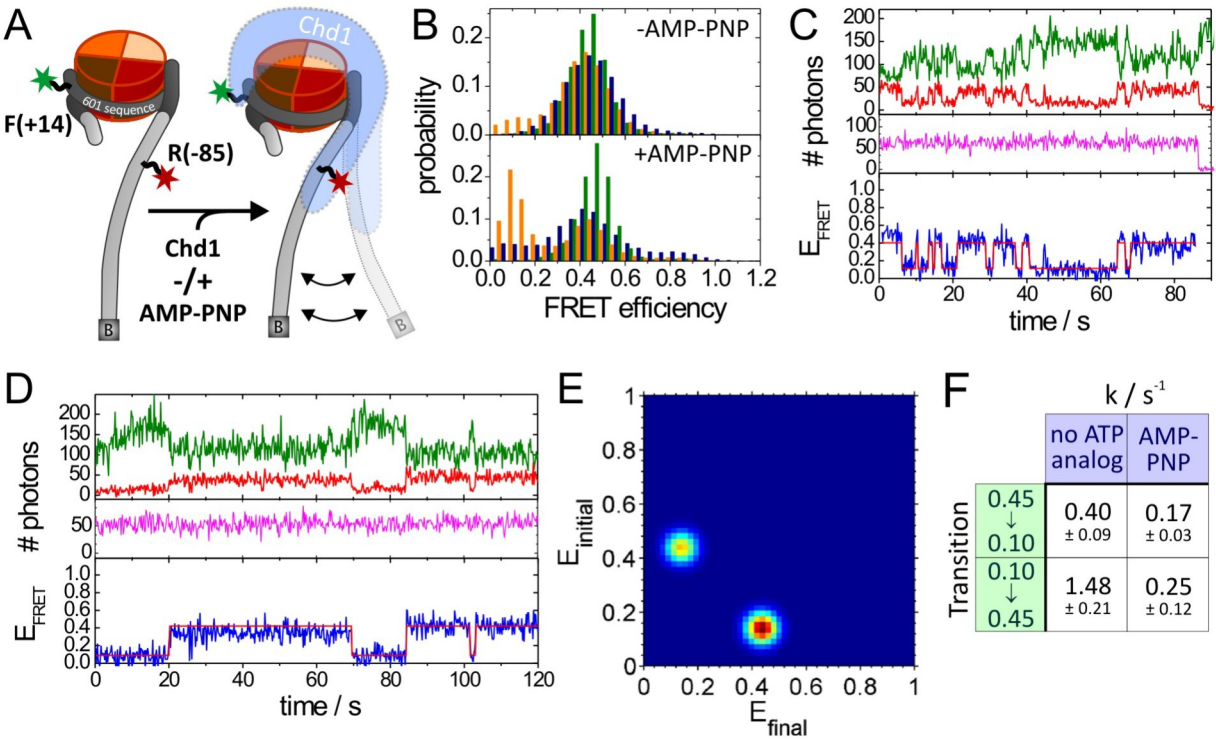

Supplement: supp [file elife-22510-supp-v1.zip › elife_poa_e22510_Figure_8_Supplement_3.pdf]

## Distance measurements from ATPase lobe 1 to DBD

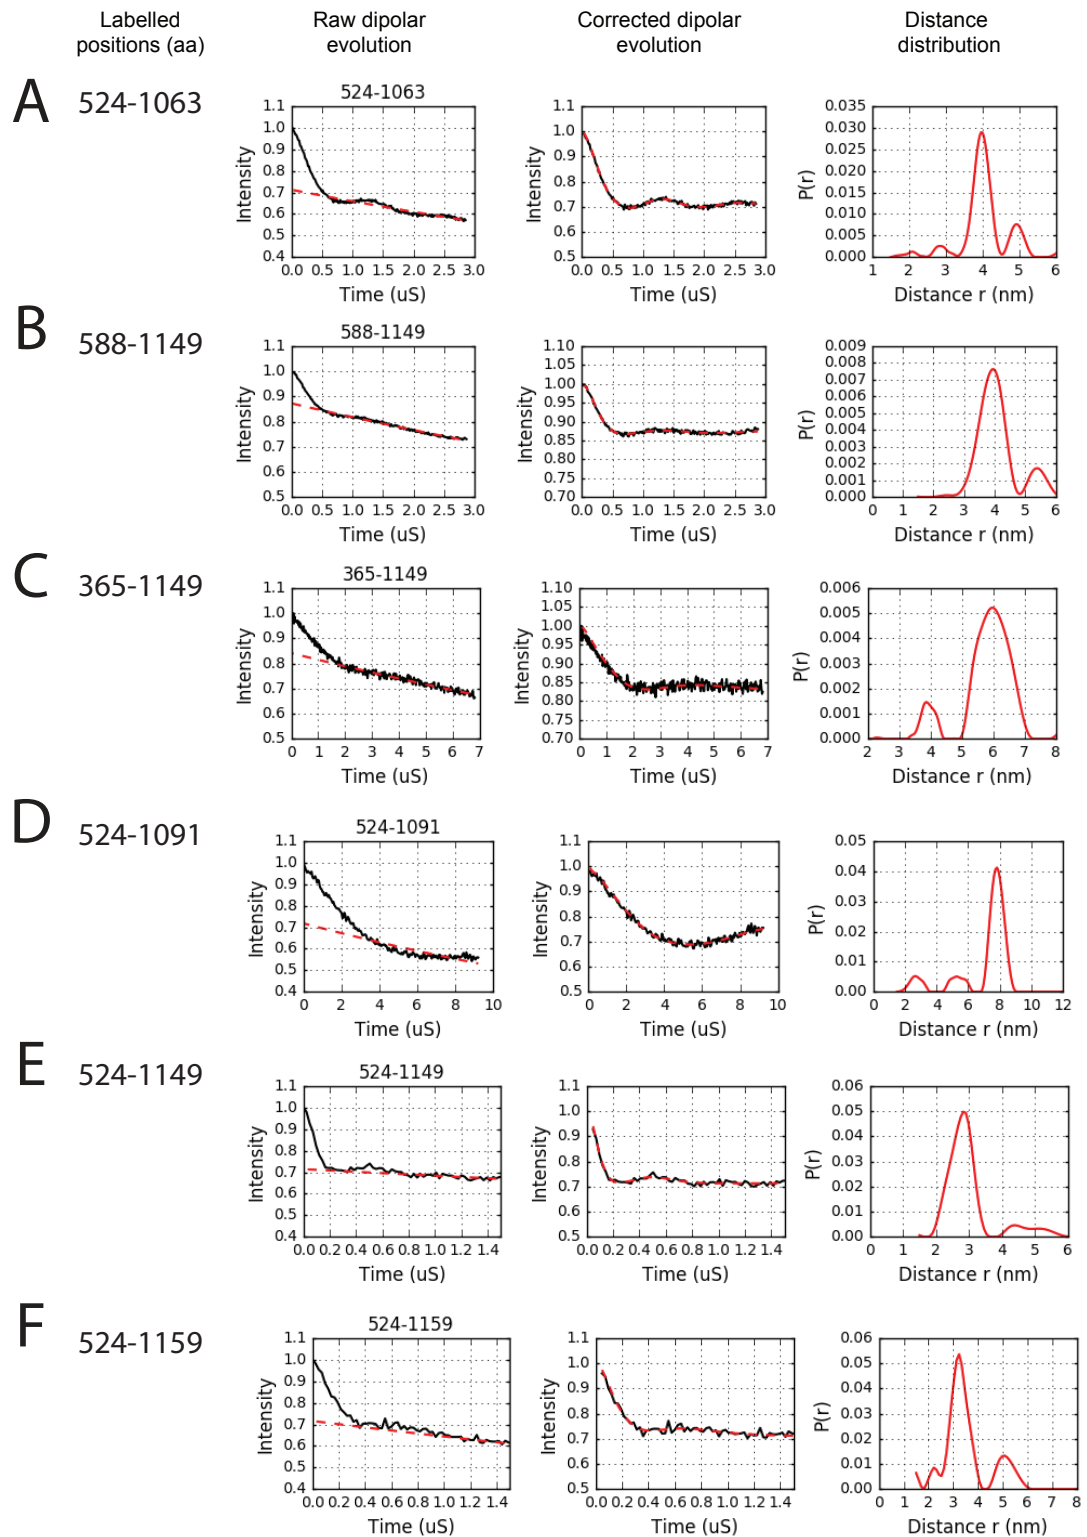

Supplement: supp [file elife-22510-supp-v1.zip › elife_poa_e22510_Figure_2_Supplement_3.pdf]

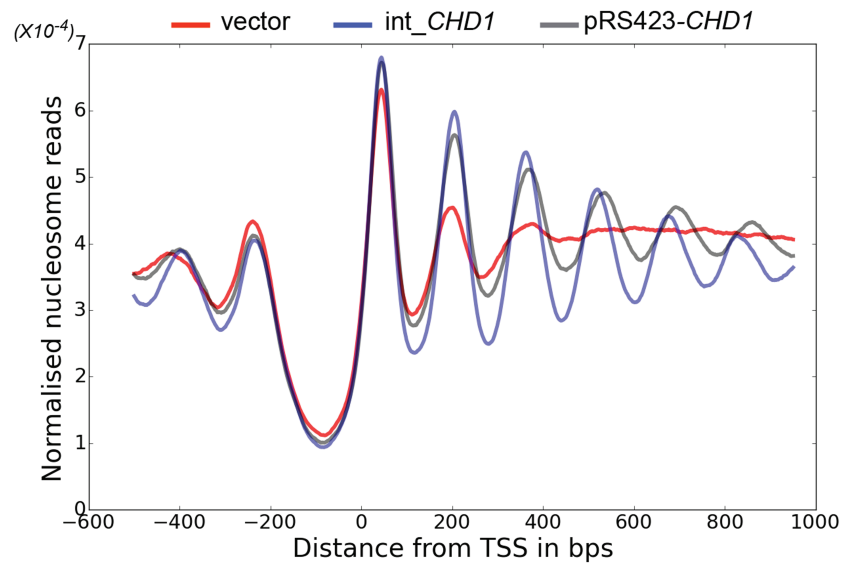

Supplement: supp [file elife-22510-supp-v1.zip › elife_poa_e22510_Figure_5_Supplement_2.pdf]

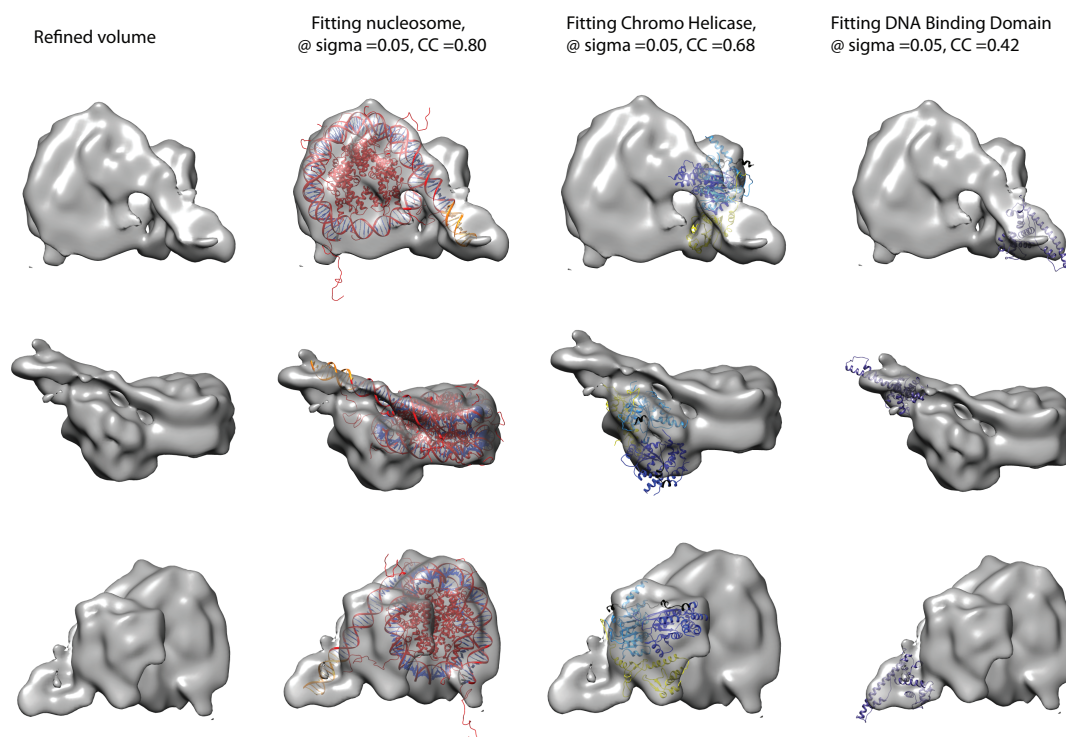

Supplement: supp [file elife-22510-supp-v1.zip › elife_poa_e22510_Figure_7_Supplement_2.pdf]

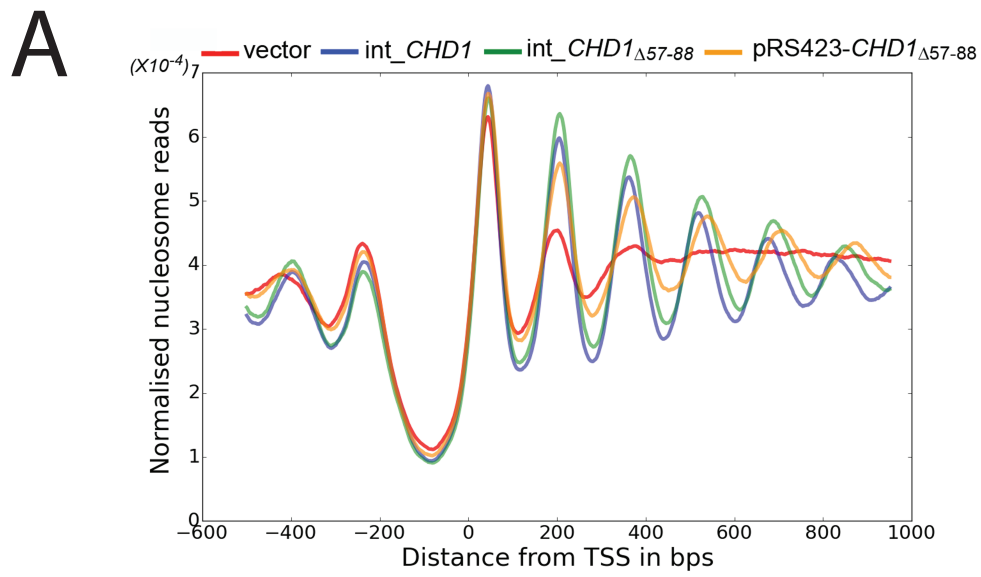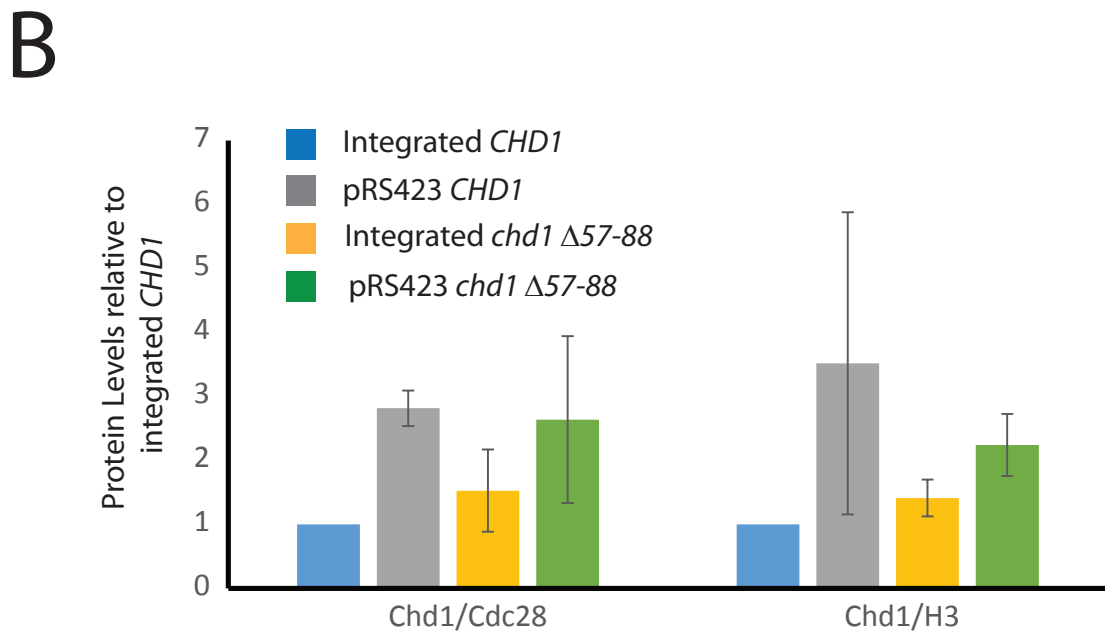

Supplement: supp [file elife-22510-supp-v1.zip › elife_poa_e22510_Figure_5_Supplement_3.pdf]

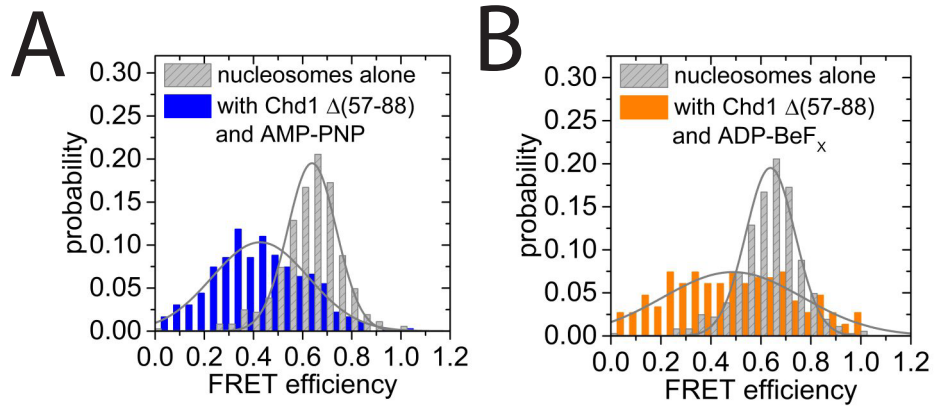

Supplement: supp [file elife-22510-supp-v1.zip › elife_poa_e22510_Figure_8_Supplement_2.pdf]

## Distance measurements from chromodomains to DBD

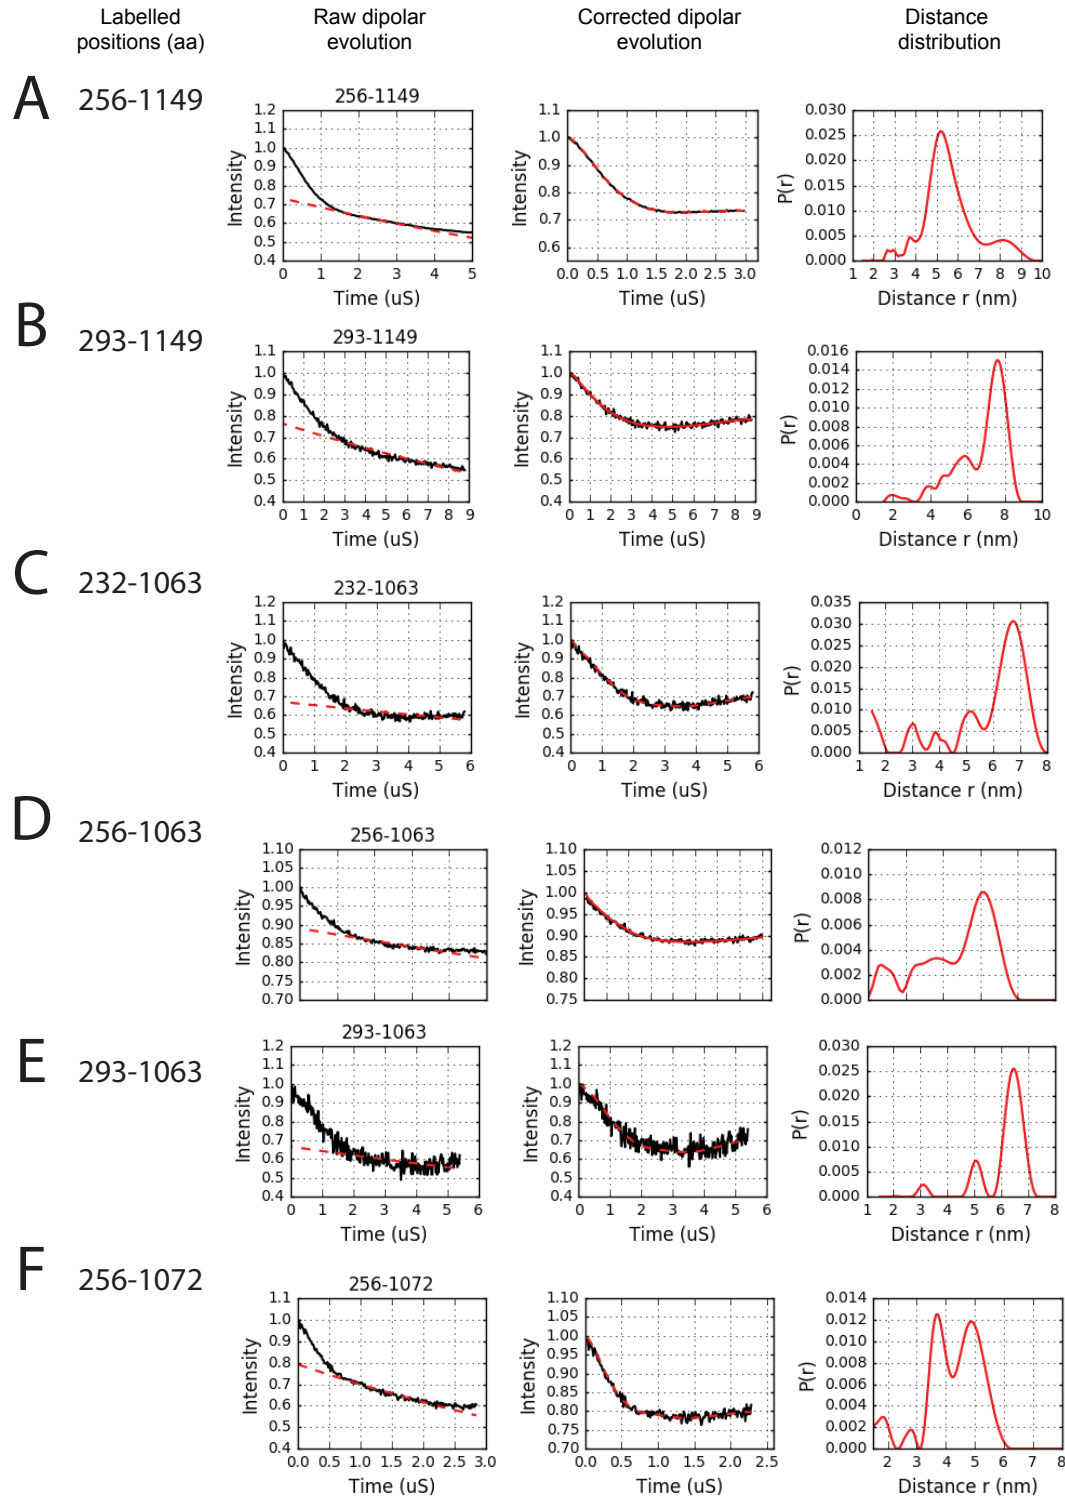

Supplement: supp [file elife-22510-supp-v1.zip › elife_poa_e22510_Figure_2_Supplement_5.pdf]

A

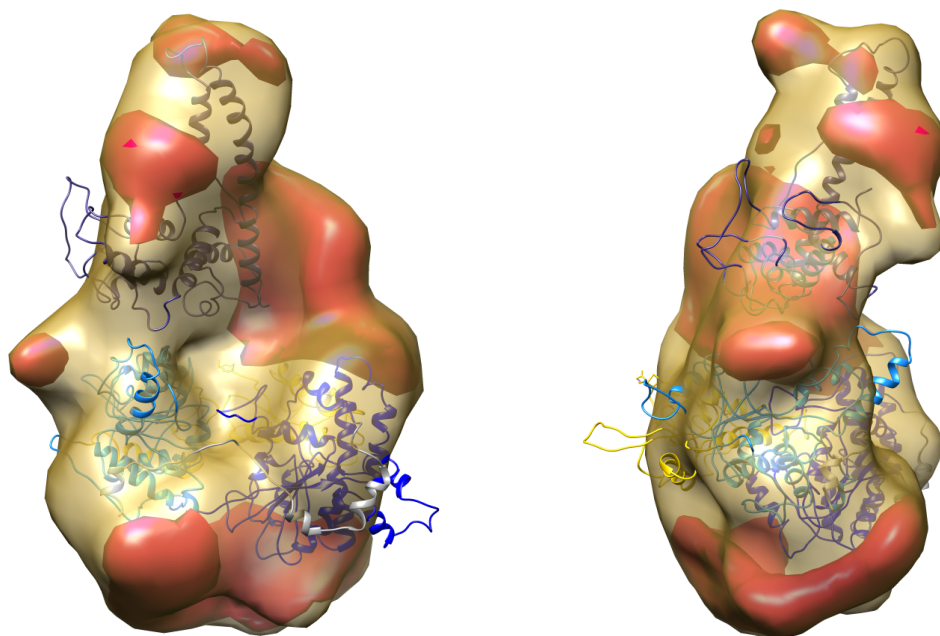

B

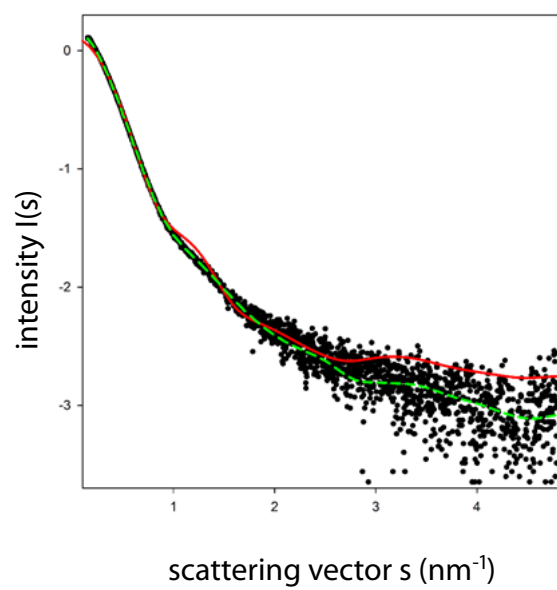

Supplement: supp [file elife-22510-supp-v1.zip › elife_poa_e22510_Figure_2_Supplement_7.pdf]

A

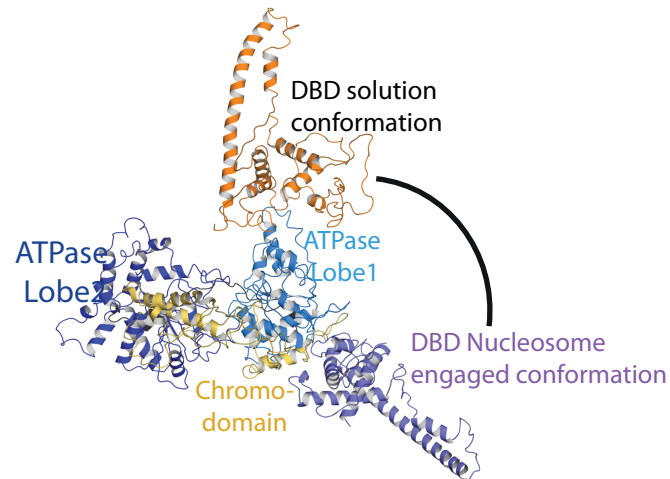

B

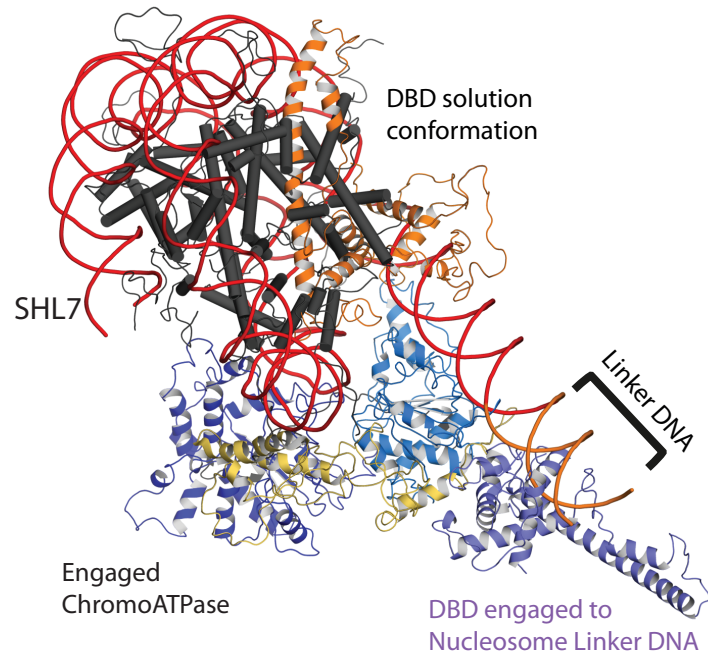

C

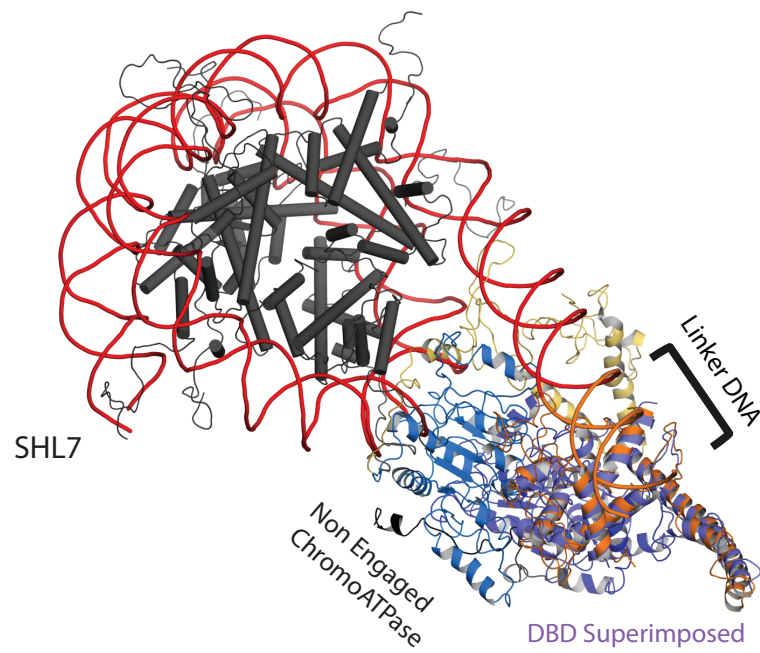

Supplement: supp [file elife-22510-supp-v1.zip › elife_poa_e22510_Figure_7_Supplement_3.pdf]

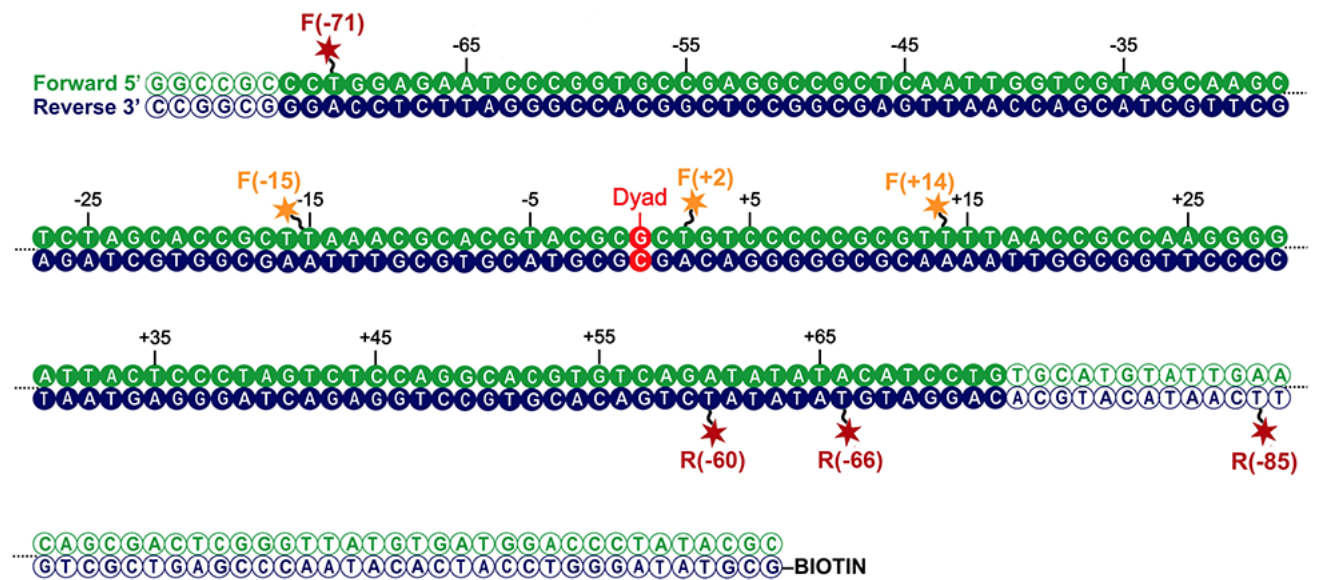

Supplement: supp [file elife-22510-supp-v1.zip › elife_poa_e22510_Figure_8_Supplement_1.pdf]

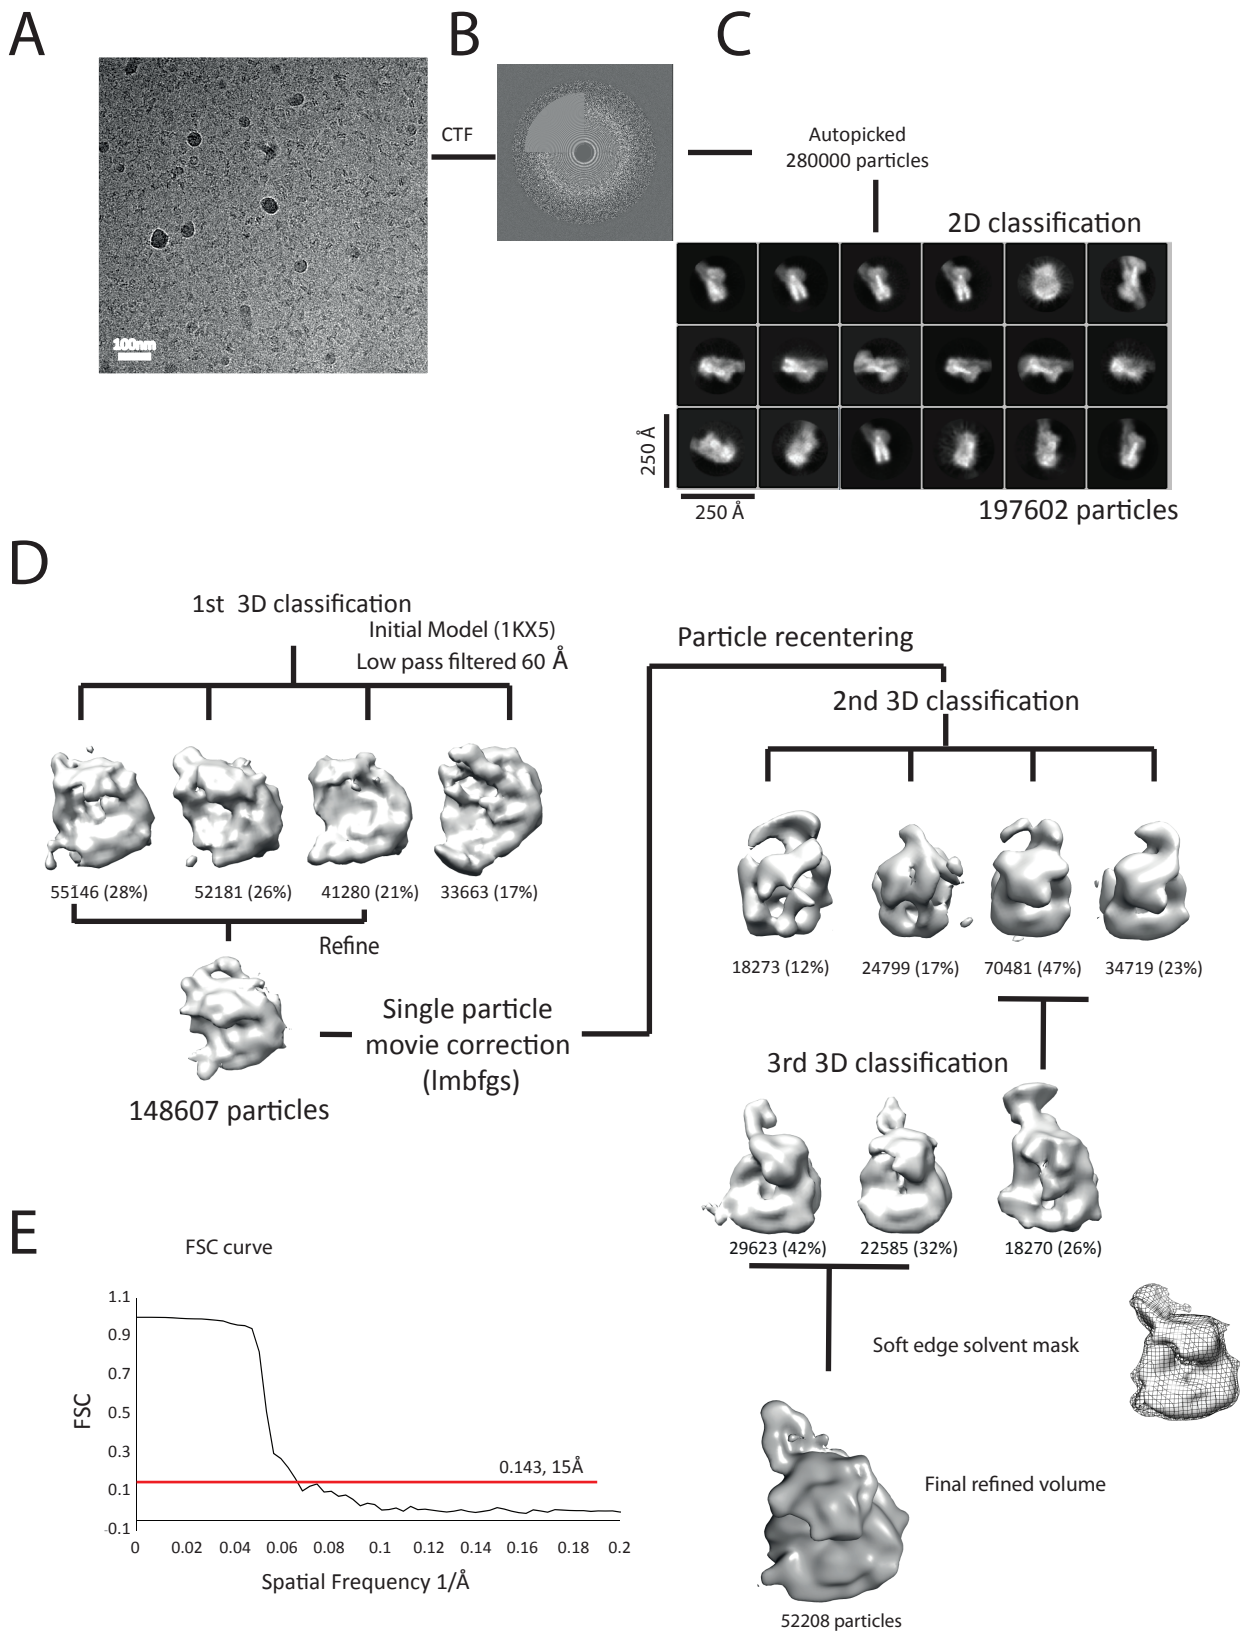

Supplement: supp [file elife-22510-supp-v1.zip › elife_poa_e22510_Figure_7_Supplement_1.pdf]
